# Supplementary material for: Fyn phosphorylates AMPK to inhibit AMPK activity and AMP-dependent activation of autophagy
Source: PubMed Central journal article supplement (PMC5340180; doi:10.18632/oncotarget.11916), 2016-09-08
Supplement: oncotarget-07-74612-s001.pdf [file oncotarget-07-74612-s001.pdf]

## Fyn phosphorylates AMPK to inhibit AMPK activity and AMP-dependent activation of autophagy

### Supplementary Material

A

| Protein Name | Site | Peptide                 | HSA-FynT #1 | HSA-FynT #2 | Fyn KO #1 | Fyn KO #2 |
|--------------|------|-------------------------|-------------|-------------|-----------|-----------|
| STAT3        | Y705 | YCRPESQEHPEADPGSAAPY*LK | 27,205      | 33,603      | 10,586    | 8,363     |
| AMPK1        | Y436 | VVNPY*YLR               | 72,612      | 56,441      | 4,437     | 5,259     |

B

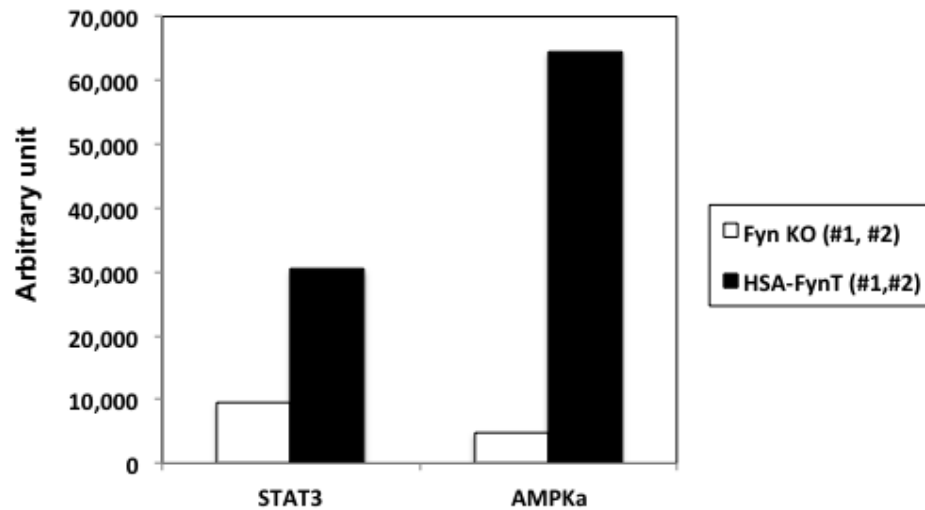

### Supplementary Figure 1.

Cell Signaling Technology (Boston, MA, USA)'s PhosphoScan<sup>®</sup> proteomics platform was used to identify and quantify differences in phosphorylation in two FynT transgenic mice and FynKO mice muscle tissue. The PhosphoScan method combines the isolation of phosphorylated peptides from protease digested protein extracts using CST's proprietary immunoaffinity purification method with the identification and quantitation of peptides by liquid chromatography, tandem mass spectrometry (LC-MS/MS). Phosphorylation site and fold increase in FynT transgenic mice compared to FynKO mice are showed in supplementary Fig 1A and B.

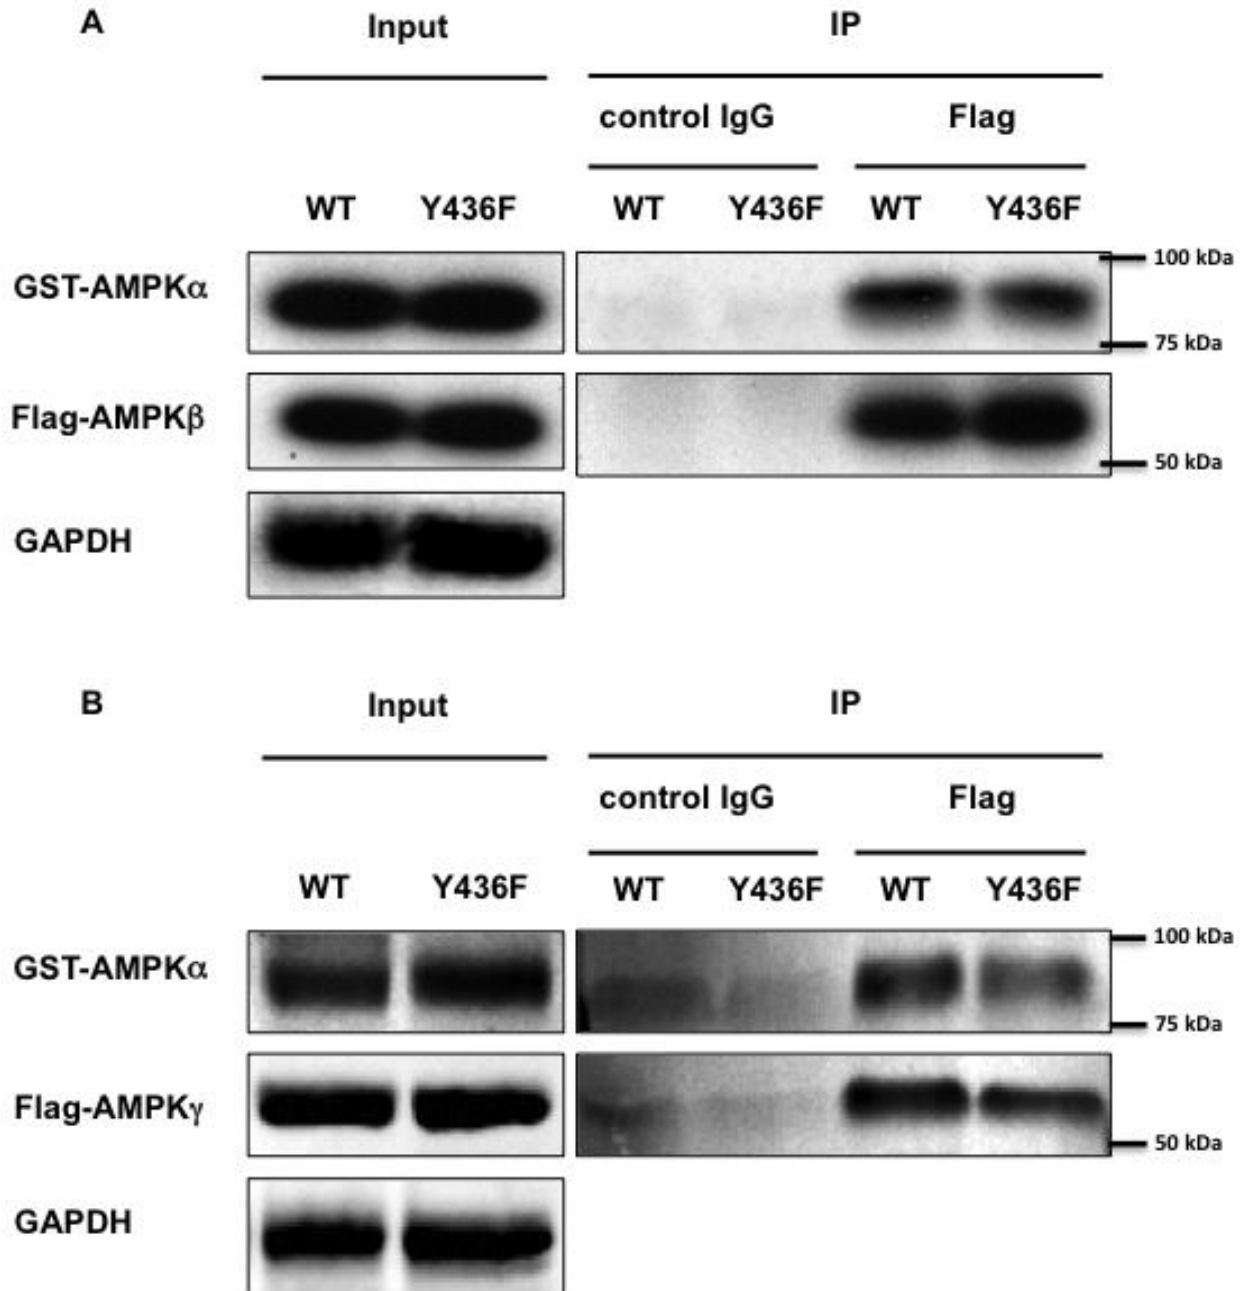

**Supplementary Figure 2**

(A) HEK293T cells were co-transfected by either GST-AMPK $\alpha$  WT or Y436F with Flag-AMPK $\beta$ 2 subunit. Immunoprecipitation was performed using a Flag antibody. Immunoblots were performed with the indicated antibodies. (B) HEK293T cells were co-transfected by either GST-AMPK $\alpha$  WT or Y436F with Flag-AMPK $\gamma$ 3 subunit. Immunoprecipitation was performed with a Flag antibody. Immunoblots were performed with the indicated antibodies.

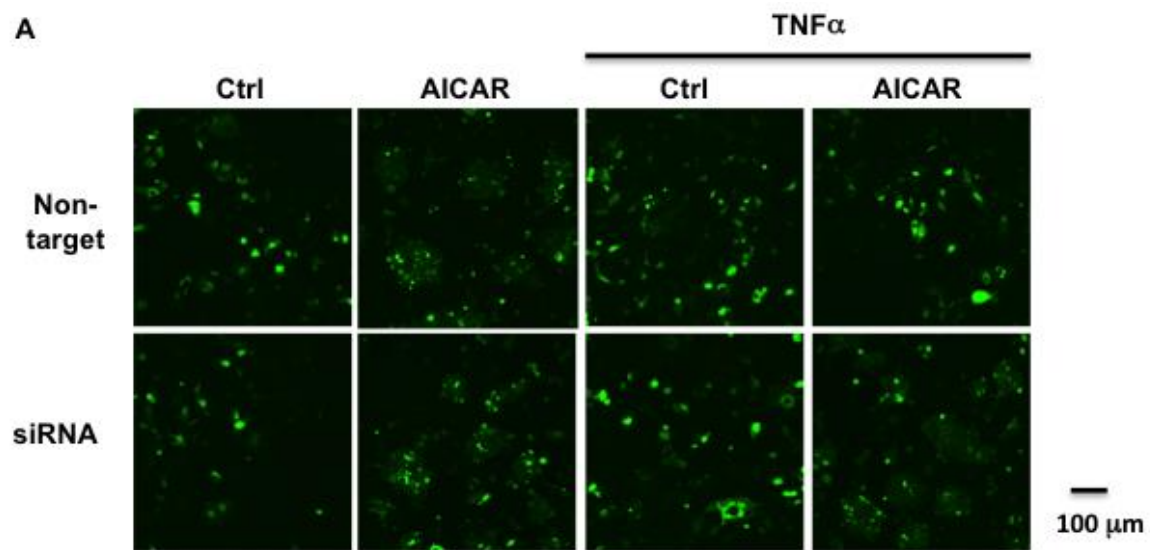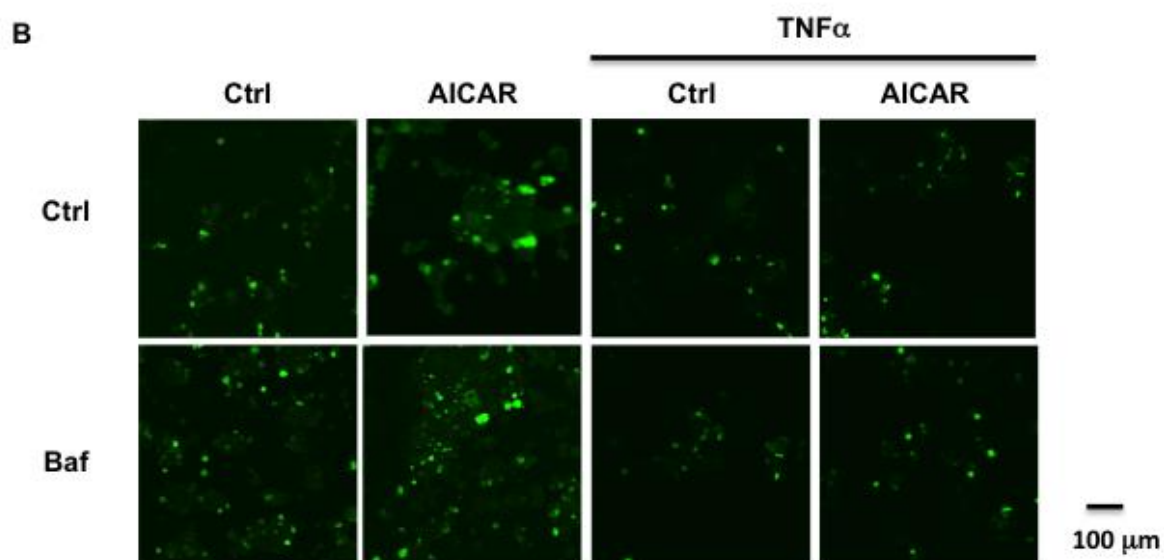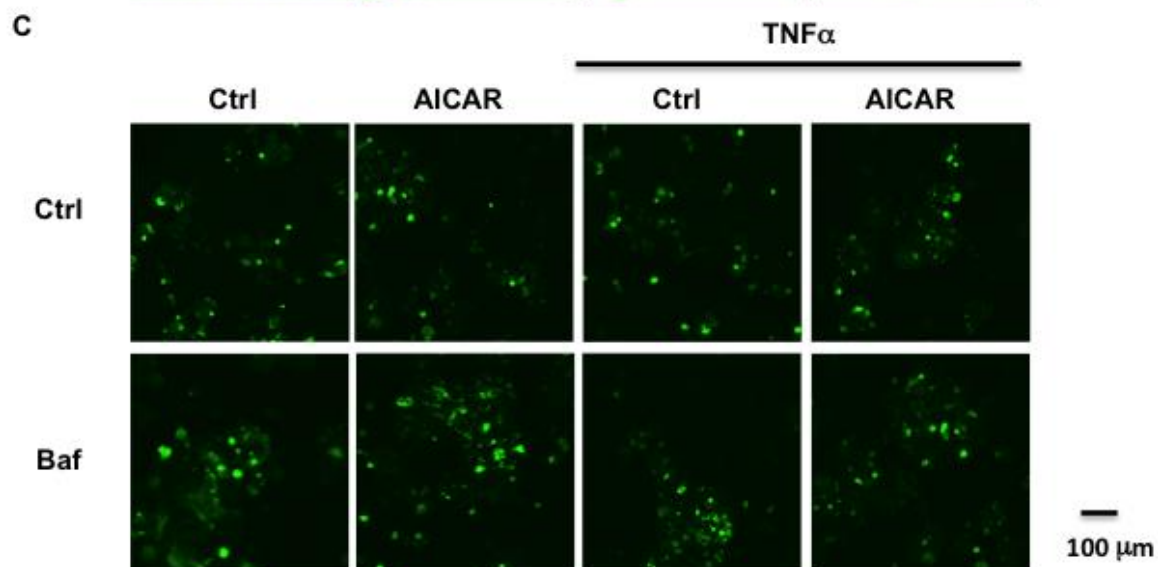

### **Supplementary Figure 3**

(A) HEK293T cells were transfected with both siRNA for Fyn and GFP-human LC3 construct. Cells were treated with 10 ng/ml TNF $\alpha$  for 36 h with or without 2 mM AICAR for 10 min. Cells were fixed with 4% paraformaldehyde and mounted with DAKOCytomation Fluorescent Mounting Medium (S3023). These are representative images of low power field from experiments independently performed 3 times. (B) HEK293T cells were transfected with both siRNA for Fyn and GFP-human LC3 construct. Cells were treated with 10 ng/ml TNF $\alpha$  for 36 h with or without 100 nM Bafilomycin for 4 h and 2 mM AICAR for 10 min. Cells were fixed with 4% paraformaldehyde and mounted with DAKOCytomation Fluorescent Mounting Medium (S3023). These are representative images of low power field from experiments of non-target siRNA transfected cells (B) or Fyn siRNA transfected cells (C) independently performed 3 times.
